# Supplementary material for: The Role of Pathological Method and Clearance Definition for the Evaluation of Margin Status after Pancreatoduodenectomy for Periampullary Cancer. Results of a Multicenter Prospective Randomized Trial
Source: MDPI journal article supplement (doi:10.3390/cancers13092097), 2021-04-26
Supplement: s1 [file s1]

**Table S1.** Histopathological results according to tumor histology.

|                                       | PDAC (N. 123)      |                    |           | Ampullary cancer (N. 29) |                   |           | Distal cholangioK (N. 16) |                   |        |
|---------------------------------------|--------------------|--------------------|-----------|--------------------------|-------------------|-----------|---------------------------|-------------------|--------|
|                                       | Group A<br>(N. 55) | Group B<br>(N. 68) | P         | Group A<br>(N. 20)       | Group B<br>(N. 9) | p         | Group A<br>(N. 9)         | Group B<br>(N. 7) | p      |
| Tumor size, main<br>cm (range)        | 3.09 (3.0–<br>3.2) | 3.11 (3.0–<br>3.2) | ><br>0.05 | 2 (1.8–2.2)              | 2.2 (1.9–<br>2.5) | ><br>0.05 | 1.57 (1.3–<br>1.8)        | 2.6 (2.1–3)       | < 0.05 |
| T status:                             |                    |                    | >         |                          |                   | >         |                           |                   | > 0.05 |
| - Tis, n. (%)                         | 0 (0%)             | 0 (0%)             | 0.05      | 0 (0%)                   | 0 (0%)            | 0.05      | 1 (11.1%)                 | 0 (0%)            |        |
| - T1, n. (%)                          | 0 (0%)             | 0 (1.5%)           |           | 2 (10%)                  | 1 (11.1%)         |           | 0 (%)                     | 1 (14.3%)         |        |
| - T2, n. (%)                          | 0 (0%)             | 0 (0%)             |           | 10 (50%)                 | 2 (22.2%)         |           | 0 (0%)                    | 0 (0%)            |        |
| - T3, n. (%)                          | 53 (96.4%)         | 67 (97.0%)         |           | 4 (20%)                  | 2 (22.2%)         |           | 8 (88.9%)                 | 6 (85.7%)         |        |
| - T4, n. (%)                          | 2 (3.6%)           | 1 (1.5%)           |           | 4 (20%)                  | 4 (44.4%)         |           | 0 (0%)                    | 0 (0%)            |        |
| Nodal involvement,<br>n. (%)          | 48 (87.2%)         | 53 (77.9%)         | ><br>0.05 | 14 (70.0%)               | 4 (44.4%)         | ><br>0.05 | 7 (77.7%)                 | 6 (85.7%)         | > 0.05 |
| Grading:                              |                    |                    | >         |                          |                   | >         |                           |                   | > 0.05 |
| - Gx, n. (%)                          | 5 (9.1%)           | 6 (8.8%)           | 0.05      | 0 (0%)                   | 0 (0%)            | 0.05      | 0 (0%)                    | 0 (0%)            |        |
| - G1, n. (%)                          | 0 (0%)             | 2 (2.9%)           |           | 1 (5%)                   | 3 (33.3%)         |           | 2 (22.2%)                 | 1 (14.3%)         |        |
| - G2, n. (%)                          | 29 (52.7%)         | 35 (51.5%)         |           | 6 (30%)                  | 2 (22.2%)         |           | 5 (55.5%)                 | 2 (28.6%)         |        |
| - G3, n. (%)                          | 20 (36.4%)         | 24 (35.3%)         |           | 13 (65%)                 | 4 (44.4%)         |           | 2 (22.2%)                 | 3 (42.0%)         |        |
| - G4, n. (%)                          | 1 (1.9%)           | 6 (8.8%)           |           | 0 (0%)                   | 0 (0%)            |           | 0 (0%)                    | 1 (14.3%)         |        |
| Vascular invasion,<br>n. (%)          | 29 (52.7%)         | 41 (60.2%)         | ><br>0.05 | 12 (60%)                 | 4 (44.4%)         | ><br>0.05 | 3 (33.3%)                 | 3 (42.8%)         | > 0.05 |
| Lymphatic<br>invasion, n. (%)         | 21 (38.1%)         | 25 (36.7%)         | ><br>0.05 | 9 (45.0%)                | 3 (33.3%)         | ><br>0.05 | 2 (22.2%)                 | 4 (57.4%)         | > 0.05 |
| Perineural invasion,<br>n. (%)        | 53 (96.3%)         | 59 (86.7%)         | ><br>0.05 | 7 (35.0%)                | 2 (22.2%)         | ><br>0.05 | 7 (77.7%)                 | 5 (71.4%)         | > 0.05 |
| N. of retrieved LN*,<br>mean (range)  | 43.1 (12–<br>97)   | 30.6 (5–97)        | <.001     | 32.5 (17–<br>50)         | 24.7 (14–<br>39)  | <<br>0.05 | 34.7 (21–48)              | 25.8 (18–<br>38)  | < 0.05 |
| N. of metastatic<br>LN*, mean (range) | 5.5 (0–29)         | 4.9 (0–25)         | ><br>0.05 | 3.6 (0–16)               | 0.8 (0–3)         | ><br>0.05 | 1.8 (0–4)                 | 3.7 (0–12)        | > 0.05 |
| N. of blocks, mean<br>(range)         | 49.2 (20–<br>95)   | 37.0 (13–<br>109)  | <<br>0.01 | 49 (25–77)               | 29.6 (15–<br>70)  | <<br>0.01 | 53.8 (33–70)              | 34 (16–83)        | < 0.05 |
| Adjuvant                              | 47 (85.4%)         | 49 (73.1%)         | >         | 13 (65.0%)               | 2 (22.2%)         | <         | 7 (77.7%)                 | 7 (100%)          | > 0.05 |

|                          |  |  |      |  |  |      |  |  |  |
|--------------------------|--|--|------|--|--|------|--|--|--|
| treatment, <i>n.</i> (%) |  |  | 0.05 |  |  | 0.05 |  |  |  |
|--------------------------|--|--|------|--|--|------|--|--|--|

\*LN: lymphnode
